# Supplementary material
Source: MDPI journal article supplement (https://www.mdpi.com/2079-6412/11/5/493)
Supplement: s1 [file s1]

# High Transmittance Superhydrophobic Coatings with Durable Self-Cleaning Properties

Michele Ferrari <sup>1,\*</sup>, Paolo Piccardo <sup>1,2</sup>, Justine Vernet <sup>1,2</sup> and Francesca Cirisano <sup>1</sup>

<sup>1</sup> CNR-ICMATE National Research Council, Institute of Condensed Matter Chemistry and Technologies for Energy, Via De Marini 6, 16149 Genova, Italy; paolo.piccardo@unige.it (P.P.); vermet.justine@gmail.com (J.V.); francesca.cirisano@ge.icmate.cnr.it (F.C.)

<sup>2</sup> DCCI-LMM, University of Genoa, Via Dodecaneso 31, 16146 Genova, Italy

\* Correspondence: michele.ferrari@ge.icmate.cnr.it

## DLS measurements of 0.5 and 2 g/L dispersions

It is possible to observe the size particle/agglomerate population present in the higher and lower concentration of the studied range. The overlapped peaks in Figure S1 suggest higher stability of the dispersion while the peaks in Figure S2 indicate the appearance of different population as a function of time: red, initial stage; green peak stage of agglomeration and blue peak corresponds to a particle sedimentation process. The latter situation underlines the stability decreasing at high SiO<sub>2</sub> concentration.

**Citation:** Ferrari, M.; Piccardo, P.; Vernet, J.; Cirisano, F. High Transmittance Superhydrophobic Coatings with Durable Self-Cleaning Properties. *Coatings* **2021**, *11*, 493. <https://doi.org/10.3390/coatings11050493>

Academic Editor:  
Ioannis Karapanagiotis

Received: 18 March 2021

Accepted: 21 April 2021

Published: 22 April 2021

**Publisher's Note:** MDPI stays neutral with regard to jurisdictional claims in published maps and institutional affiliations.

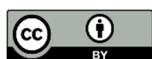

**Copyright:** © 2021 by the authors. Licensee MDPI, Basel, Switzerland. This article is an open access article distributed under the terms and conditions of the Creative Commons Attribution (CC BY) license (<http://creativecommons.org/licenses/by/4.0/>).

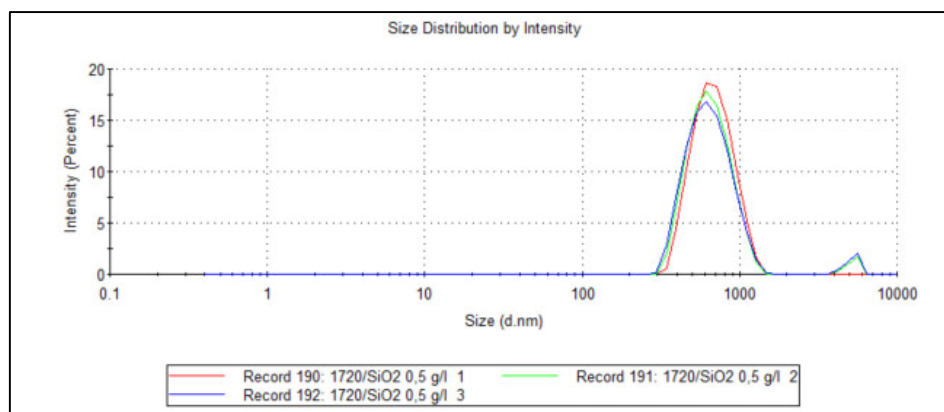

**Figure S1.** DLS measurements of 0.5 g/L dispersion.

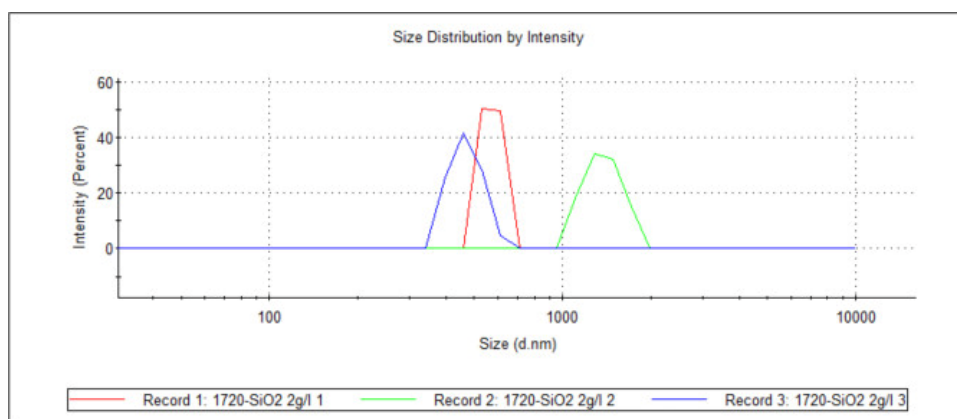

**Figure S2.** DLS measurements of 2 g/L dispersion.
